# Supplementary material for: Relating optical and microwave grain metrics of snow: the relevance of grain shape
Source: Copernicus journal article supplement (doi:10.5194/tc-10-2847-2016), 2016-11-21
Supplement: Supplementary file 1 [file tc-10-2847-2016-supplement.zip]

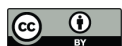

## *Supplement of*

# **Relating optical and microwave grain metrics of snow: the relevance of grain shape**

**Quirine Krol and Henning Löwe**

*Correspondence to:* Henning Löwe (loewe@slf.ch)

- tc-10-2847-2016-supplement-title-page.pdf
- all\_lengthscales\_results.txt

The copyright of individual parts of the supplement might differ from the CC-BY 3.0 licence.
