# Supplementary material for: Relating optical and microwave grain metrics of snow: the relevance of grain shape
Source: Copernicus journal article supplement (doi:10.5194/tc-10-2847-2016), 2016-11-21
Supplement: Supplementary file 2 [file tc-10-2847-2016-supplement.zip]

Archive with 2 entries (2 files):
- tc-10-2847-2016-supplement-title-page.pdf
- all_lengthscales_results.txt
