# Supplementary material for: Relating optical and microwave grain metrics of snow: the relevance of grain shape
Source: Copernicus journal article supplement (doi:10.5194/tc-10-2847-2016), 2016-11-21
Supplement: Supplementary file 2 [file tc-10-2847-2016-supplement.zip › all_lengthscales_results.txt]

identification dataset snowtype lambda_1_cf lambda_2_cf xi_cf lambda_1_vtk_50 lambda_2_vtk_50 lambda_1_vtk_200 lambda_2_vtk_200 phi_cl mu_1 mu_2
D0001091_SEG_ADTHRESHOLD_SCALED2 BLOCK DF 0.000146245830646 0.000329035328476 9.40927779424e-05 0.000151201308181 0.000270591134085 0.000176916667207 0.000284590575056 0.192926742169 0.000183140542446 4.90110207194e-08
D0001095_SEG_ADTHRESHOLD_SCALED2 BLOCK RG 0.000152582264156 0.000333140607303 9.89927449291e-05 0.000156602561375 0.000263822002007 0.000183162721325 0.000283529482385 0.219281118501 0.000195612185874 5.52797095764e-08
D0001112_SEG_ADTHRESHOLD_SCALED2 BLOCK RG 0.000174745375333 0.000325748710398 0.00013004372942 0.000178449992462 0.000240223375644 0.000211340081139 0.000251470356368 0.175210811307 0.000209166727583 6.62516811132e-08
D0001129_SEG_ADTHRESHOLD_SCALED2 BLOCK DH 0.000200231609933 0.000325852230271 0.000166247799286 0.000205033152182 0.000238070014897 0.000240593322271 0.000253063825004 0.21279316994 0.000248964010383 1.01925997644e-07
D0001175_SEG_ADTHRESHOLD_SCALED2 BLOCK DH 0.000250750631298 0.000392515967018 0.000203293245342 0.00025657617326 0.000307917575918 0.000287848540147 0.00036387060586 0.269437693948 0.000341375802634 1.86077653056e-07
D0001177_SEG_ADTHRESHOLD_SCALED2 BLOCK DH 0.000292821817365 0.000370329543995 0.000277691942968 0.000302404228005 0.000281474536389 0.000341815519914 0.000321915361347 0.318245200706 0.000420563624326 3.09797100085e-07
D0001090_SEG_ADTHRESHOLD_SCALED2 SIEVED DF 0.000144443179775 0.000314376667827 9.79729876846e-05 0.000149558209666 0.000262089748813 0.000173743317445 0.000285694817177 0.278961304711 0.000200287836598 5.81572312797e-08
D0001131_SEG_ADTHRESHOLD_SCALED2 SIEVED RG 0.000183714624556 0.000332115533068 0.000137503397443 0.000190215604527 0.000260422705705 0.000218991233663 0.000291068377303 0.353848272543 0.00027941772419 1.23354196392e-07
D0001143_SEG_ADTHRESHOLD_SCALED2 SIEVED FC 0.000219291855583 0.000348579537226 0.000180078703285 0.000228602101024 0.000272303902795 0.000261051563327 0.000306605321155 0.326813178206 0.000320776870535 1.6960805839e-07
D0001176_SEG_ADTHRESHOLD_SCALED2 SIEVED DH 0.000257714917729 0.000349033077755 0.000242273682218 0.000267100922703 0.000264544074261 0.000304727088947 0.000294976945435 0.400438292732 0.000418063513913 3.16133367896e-07
C0002070_SEG_SCALED ISL1 DF 7.48505470596e-05 0.000148197253696 5.7758337294e-05 7.56250767407e-05 0.000123952498992 8.51125586894e-05 0.000144852312793 0.16347217537 9.11566299499e-05 1.33655104904e-08
C0002120_SEG_SCALED ISL1 RG 0.000120567448317 0.000254801114484 8.02449239292e-05 0.000114825103748 0.000161544437186 0.000123106091507 0.000236323206049 0.17441885868 0.000146438724982 3.23135382539e-08
C0002188_SEG_SCALED ISL1 RG 0.000141749705866 0.000296276457574 8.97704421742e-05 0.000137570003617 0.000171397440407 0.000145995276702 0.000275322980896 0.186626902781 0.000174177853209 4.46124803273e-08
C0002230_SEG_SCALED ISL1 RG 0.000153723264347 0.000314776632151 9.69883277451e-05 0.000148373283604 0.000175244903856 0.000156796134109 0.000295134330804 0.199449700081 0.000191624290583 5.35565559483e-08
C0002311_SEG_SCALED ISL1 RG 0.000165862998802 0.000336211699259 0.000102155914274 0.000160018541535 0.00017814103781 0.000168596698105 0.000313656483606 0.21048730877 0.000209485891627 6.39176143103e-08
C0002444_SEG_SCALED ISL1 RG 0.000183749915801 0.000363367165381 0.000112161284766 0.000177026156439 0.000181133665608 0.000185940592129 0.000334165522859 0.225318824653 0.00023592306955 8.03375159474e-08
C0002618_SEG_SCALED ISL1 RG 0.000216786531521 0.000381891169355 0.000134564263533 0.000209945097124 0.000184261733737 0.000219874617145 0.000355881573337 0.225473824963 0.000278122940968 1.08735101581e-07
C0002735_SEG_SCALED ISL1 RG 0.000231051592583 0.000390365865356 0.000136605333505 0.000225313856988 0.00018404618586 0.0002356584041 0.000376923975715 0.261166063671 0.000309589155053 1.33658413117e-07
C0002742_SEG_SCALED ISL1 RG 0.000233170238114 0.00038832068379 0.000137661680035 0.000229619084685 0.0001841501506 0.000240110742431 0.000379982624299 0.268370404851 0.000315107870885 1.38707665962e-07
C0002081_SEG_SCALED ISL5 DF 8.62910402402e-05 0.000164665880868 6.47746606287e-05 8.5785315188e-05 0.000123811506063 9.54525186526e-05 0.000148879183174 0.170199493942 0.000104568753761 1.79144592324e-08
C0002127_SEG_SCALED ISL5 RG 0.000114001722784 0.000242795876319 7.66062193361e-05 0.000110667017206 0.000156615646095 0.000119199323459 0.000222071611624 0.174946225877 0.000138478128736 2.974945349e-08
C0002194_SEG_SCALED ISL5 RG 0.000129993806608 0.00027508258054 8.62524481365e-05 0.000124341794697 0.00016413811881 0.000132861563179 0.000247855571399 0.168745969382 0.000156527333192 3.73866542136e-08
C0002236_SEG_SCALED ISL5 RG 0.000137212113683 0.000286998230687 8.95517814649e-05 0.000132707014864 0.000167316807528 0.00014131452878 0.000260336207992 0.176916865645 0.000166634460362 4.20989490322e-08
C0002317_SEG_SCALED ISL5 RG 0.000147872222662 0.0002929929256 9.68931019174e-05 0.000140890611467 0.000167458109775 0.000149696240319 0.000268355182718 0.174517534074 0.000179069347579 4.77577678036e-08
C0002459_SEG_SCALED ISL5 RG 0.000162829120196 0.000310647519509 0.000106873019498 0.000157197742058 0.000171619518935 0.000166337538336 0.000287685008428 0.173063338253 0.000196646970382 5.68062627482e-08
C0002622_SEG_SCALED ISL5 RG 0.000183256344588 0.000366655167238 0.000113771530874 0.000177232266799 0.00018172802965 0.000186195452465 0.000333924239884 0.203283577827 0.000229210876989 7.61725451429e-08
C0002738_SEG_SCALED ISL5 RG 0.000194619578133 0.00035250236864 0.0001223830224 0.000190257339683 0.000180355584387 0.000199810276595 0.000338686364793 0.212452822543 0.000245556387575 8.80144007992e-08
C0002744_SEG_SCALED ISL5 RG 0.000196759240108 0.00035305165102 0.000123736983199 0.0001934448998 0.000180847139106 0.000203090719531 0.000341779559914 0.217012272607 0.000249432319924 9.13759248281e-08
2164 TGM2 DF 9.89469248604e-05 0.000163627922006 7.64121196004e-05 0.000100621250906 0.000119263869886 0.000110583198306 0.000149671767561 0.219805888889 0.000127254910883 2.64209333644e-08
2165 TGM2 DF 9.94942914265e-05 0.000162885357304 7.73750426968e-05 0.000101311547191 0.000118916738783 0.000111388125148 0.000149133351683 0.221509888889 0.000128235318081 2.68433728425e-08
2166 TGM2 DF 0.000101470355219 0.000160768997795 8.06210132454e-05 0.000103592790535 0.000117858612394 0.000114079080481 0.000147012521429 0.219145259259 0.000130340321639 2.78190781897e-08
2167 TGM2 DF 0.000104061630642 0.000160171658997 8.4035311675e-05 0.000106310849746 0.000117461505839 0.000117119422084 0.000146291648042 0.219593703704 0.000133717299222 2.94036206354e-08
2168 TGM2 RG 0.000106473395485 0.00015932520667 8.75598848577e-05 0.000108678370437 0.000116937688119 0.00011983622367 0.00014520834691 0.220150296296 0.000136887084269 3.10111580241e-08
2169 TGM2 RG 0.00010914110514 0.000158370220595 9.19735500032e-05 0.000111682489967 0.000116493600485 0.000123180844873 0.000144173176878 0.221097777778 0.000140447736288 3.29286811119e-08
2170 TGM2 RG 0.000112489707545 0.000159134658271 9.60440520129e-05 0.000115270298519 0.000116655242328 0.000127102696491 0.000144490350196 0.22188162963 0.000144798484265 3.51920874529e-08
2171 TGM2 RG 0.000115202848383 0.000159295589183 9.96856225022e-05 0.000118113591725 0.000116570058726 0.000130270822291 0.000144410044238 0.223473740741 0.000148575897236 3.7279393446e-08
2172 TGM2 RG 0.000117638992894 0.000159623115803 0.000102708184278 0.000120682499491 0.000116717727701 0.000133056589397 0.00014478478487 0.225737555556 0.000152123958302 3.93631892487e-08
2173 TGM2 RG 0.000120375877294 0.000159980386428 0.000106188390024 0.000123518404253 0.000116782528877 0.000136156136203 0.000144985010749 0.225218407407 0.000155457679869 4.11742231713e-08
2174 TGM2 RG 0.000122871037156 0.000160403468819 0.000109240441206 0.000126309563294 0.000116927136976 0.00013918283662 0.000145167876531 0.227953185185 0.000159288409362 4.35794234085e-08
2175 TGM2 RG 0.000124956375825 0.000160651207655 0.00011218986918 0.000128749629562 0.000117236737992 0.000141795982175 0.000146016269351 0.230668111111 0.00016249083509 4.55562274314e-08
2176 TGM2 FC 0.000127046053807 0.000161060134454 0.00011470538097 0.000130418564228 0.00011733275482 0.000143575328842 0.000146167155243 0.228907074074 0.000164788029278 4.69382599486e-08
2177 TGM2 FC 0.000128732551295 0.000162024248624 0.00011718223276 0.000132190903079 0.000117595594993 0.000145456423765 0.000146800347626 0.228154666667 0.000166751051062 4.82061356336e-08
2178 TGM2 FC 0.000130999776498 0.000162450529445 0.00011987137443 0.000134605568466 0.00011793195616 0.000148035036023 0.000147488656843 0.229860888889 0.000170035721298 5.04185396126e-08
2179 TGM2 FC 0.000134653919411 0.000164751667772 0.000122201283682 0.000138628899999 0.000118763000512 0.000152256555586 0.000149593851945 0.23048762963 0.000174818764364 5.33116017897e-08
2180 TGM2 FC 0.000137466846999 0.000166770397305 0.000124521599147 0.000141567897245 0.000119514595229 0.000155316004888 0.000151200450467 0.231261074074 0.000178631163152 5.55823011103e-08
2181 TGM2 FC 0.000143752469106 0.000168978553753 0.000131726280444 0.000147778054968 0.000120746511291 0.000161843168669 0.000154075217114 0.229391407407 0.000186238285096 6.07917822292e-08
2182 TGM2 DH 0.000144369157036 0.000167978535576 0.000133366435428 0.000148140261643 0.000120309314268 0.000162319882295 0.000152966413195 0.232205074074 0.000187662618025 6.19782920744e-08
2183 TGM2 DH 0.000146409979099 0.000168582515868 0.000135757628646 0.000149873429328 0.000120482356609 0.000164175060946 0.000153391644199 0.233362555556 0.000190770598766 6.42641763234e-08
2184 TGM2 DH 0.000148517989867 0.000169179992544 0.000138167452938 0.000152044619333 0.00012095332459 0.000166462263629 0.000154517200746 0.233762407407 0.000193565888391 6.61797689377e-08
2185 TGM2 DH 0.000150359899802 0.00016932332047 0.000140094228548 0.000153725741095 0.000120756897726 0.000168278875584 0.000154241288029 0.23532062963 0.000196436789085 6.82185558407e-08
2186 TGM2 DH 0.000151956485282 0.000168447558902 0.00014338676739 0.000155295761356 0.000120308739198 0.000170121369869 0.000153152224074 0.235626 0.000198558711164 7.00452756254e-08
2187 TGM2 DH 0.000154273145711 0.000168539803117 0.000145435442455 0.000157662542896 0.000120280493375 0.000172696367555 0.000153029642245 0.238863074074 0.000202409980594 7.28625510484e-08
2188 TGM2 DH 0.000157669307191 0.000170772812622 0.000148500248232 0.00016092949237 0.000120998828755 0.000176122862369 0.000154733159623 0.238830333333 0.000206764161592 7.57665623999e-08
2189 TGM2 DH 0.000158748451818 0.000170569249747 0.000150198875418 0.000161940023871 0.000121146370977 0.000177201886895 0.000154883412189 0.241622407407 0.000208818929983 7.75022940537e-08
2190 TGM2 DH 0.000159225593634 0.000169453370971 0.000152488646662 0.000162888219611 0.000120409204499 0.000178411981832 0.000153462641461 0.243477518519 0.000209825557457 7.89288786887e-08
2191 TGM2 DH 0.000160632725968 0.00017022875881 0.000155514343505 0.000163998754539 0.000120633138747 0.000179579461042 0.000153997513049 0.245127037037 0.000212216204533 8.0883023562e-08
2192 TGM2 DH 0.000161631337484 0.000169996864366 0.000158524156951 0.000164941984111 0.000120664648942 0.000180620470472 0.000153929473674 0.24790137037 0.000214514116652 8.31857880228e-08
2193 TGM2 DH 0.000165010956664 0.000169441816377 0.000164243562316 0.000168432982812 0.000120161517198 0.000184527060173 0.000152853973886 0.241095037037 0.000216811147577 8.52310564723e-08
2194 TGM2 DH 0.000166065690569 0.000169010339611 0.000165488687519 0.000169584820281 0.000120315198087 0.000185741392689 0.000152746480077 0.24274037037 0.000218721238085 8.71477279595e-08
2195 TGM2 DH 0.000167225786911 0.000169419784322 0.000167500093423 0.000170365565789 0.000120138940137 0.000186672454495 0.000152745876631 0.243200444444 0.000220366239776 8.87139641175e-08
2196 TGM2 DH 0.000169468306167 0.000169959531214 0.000170366417657 0.000172545124681 0.000120438227543 0.000188952554587 0.000153360769689 0.243495333333 0.000223369552784 9.11277164151e-08
2197 TGM2 DH 0.000169486695385 0.000168994904671 0.000172434601104 0.000172561884168 0.000120105093206 0.000189038031139 0.000152443492237 0.245121925926 0.000224020936081 9.24807268708e-08
2198 TGM2 DH 0.000171046499185 0.000169440021343 0.000174371600996 0.000174070612021 0.000120112040966 0.000190661405727 0.000152511210935 0.248856925926 0.000227124335998 9.51888588992e-08
2199 TGM2 DH 0.000173002917933 0.000169379989477 0.000178412291669 0.000176528691894 0.000120189623854 0.000193376426586 0.000153109586923 0.250626925926 0.000230277531096 9.79822528744e-08
2200 TGM2 DH 0.000172886738497 0.000169409938366 0.000177426076413 0.000177222900406 0.000120092146893 0.000194101368532 0.000152528245469 0.254776888889 0.000231236591516 9.90135857378e-08
2201 TGM2 DH 0.000174151461855 0.000170002772267 0.000179506331029 0.000178542240135 0.000120562237596 0.000195401617902 0.000153466512678 0.254684481481 0.000232937132125 1.00591677603e-07
2202 TGM2 DH 0.000174242837153 0.000168888297143 0.000181749003925 0.000178906796488 0.000120210198148 0.000195947241572 0.000152825733036 0.255606 0.000233146536774 1.01411409343e-07
2203 TGM2 DH 0.000177995843928 0.000169376401982 0.000187318812978 0.000182077179607 0.00011987163791 0.000199493152506 0.00015187506244 0.252135740741 0.000237537297954 1.05979877343e-07
2204 TGM2 DH 0.000183696977313 0.000174297805793 0.000188407157974 0.000188086756729 0.000122008689841 0.000205512707093 0.000156945029899 0.253222148148 0.000245182092573 1.11227200178e-07
2205 TGM2 DH 0.000184829491949 0.000174502072694 0.000190379554407 0.000189359332791 0.000122014207982 0.000206895047624 0.000156968363633 0.253212814815 0.000246711509662 1.12793879508e-07
2206 TGM2 DH 0.000186604128396 0.000174939194141 0.000193099209192 0.000191489763945 0.000122411282288 0.000209176396764 0.000157898814458 0.25137862963 0.000248494019696 1.14268693882e-07
2207 TGM2 DH 0.000187000570468 0.000175438789327 0.000192976720772 0.000191918155396 0.00012250598002 0.000209563928249 0.000158121930923 0.253028222222 0.000249481242337 1.15290880993e-07
2208 TGM2 DH 0.000187748224993 0.000175233075485 0.000194665098313 0.000193165218165 0.000122452335748 0.000210915333664 0.000157968980175 0.253445888889 0.00025067097155 1.16577272832e-07
2209 TGM2 DH 0.000187546194326 0.000175861023647 0.000194120549007 0.000192606223177 0.000122611390401 0.000210289858448 0.000158537740432 0.254892444444 0.000250914807986 1.16640843079e-07
2210 TGM2 DH 0.000188079638798 0.000175494391908 0.000195914928794 0.000193382594056 0.000122369089605 0.000211145935601 0.00015799662629 0.253949185185 0.000251282454446 1.17250404317e-07
576_seg3 MMT017 RG 0.000124148272458 0.00024737865858 7.96899033834e-05 0.000125071614887 0.000177408157881 0.000135398762167 0.000239988161915 0.326261451247 0.000183745654789 4.95147257206e-08
578_seg3 MMT017 RG 0.000125224855376 0.000247589641025 8.0473410825e-05 0.00012625954973 0.00017703469669 0.000136756703055 0.00023927182275 0.322817743764 0.00018436089789 4.98642816953e-08
580_seg3 MMT017 RG 0.000127798837291 0.000253217915322 8.1666991035e-05 0.000128940003831 0.000179468076357 0.000139521225271 0.000245789209412 0.315125907029 0.000186011541854 5.03822224147e-08
582_seg3 MMT017 RG 0.000130213231058 0.000253343933087 8.38123619443e-05 0.000131396864499 0.00017933104404 0.00014223902857 0.000245401477491 0.31469484127 0.000189361630759 5.23843444542e-08
584_seg3 MMT017 RG 0.000132759334811 0.000250927160511 8.65496221228e-05 0.000134076686547 0.0001780393772 0.000145267858452 0.000242584372205 0.320976814059 0.000194746047317 5.57739006299e-08
586_seg3 MMT017 RG 0.000134585897434 0.000247698852146 8.89758786239e-05 0.000136090630545 0.000175938371575 0.000147718537233 0.000237800513212 0.320325226757 0.000197296388527 5.77235013066e-08
588_seg3 MMT017 RG 0.000137975366993 0.000251656762848 9.13802144305e-05 0.000139625762876 0.000177863907133 0.00015139736755 0.000242222092077 0.317921938776 0.000201450601319 6.00270638463e-08
590_seg3 MMT017 RG 0.000140268283653 0.000252710189721 9.35033307227e-05 0.000142259031924 0.000178267335498 0.000154288856077 0.000243477204663 0.309669444444 0.000202393930247 6.06414262753e-08
592_seg3 MMT017 RG 0.000143008984488 0.000251428576169 9.64011937732e-05 0.000145299507906 0.00017715065374 0.000157724351614 0.000240806169931 0.315368253968 0.000207976675711 6.43668771609e-08
594_seg3 MMT017 FC 0.000145599086599 0.000252050218277 9.88405981245e-05 0.000147998570459 0.000177195908464 0.000160687625186 0.000240645120489 0.310875056689 0.000210385195969 6.60193916448e-08
596_seg3 MMT017 FC 0.000147460891347 0.000248637568093 0.000101550143471 0.000150066950183 0.000175228867974 0.000163141760546 0.000235971846538 0.316208673469 0.000214730001494 6.94381636461e-08
598_seg3 MMT017 FC 0.000150561537641 0.000251325416877 0.000104191236378 0.000153353875096 0.000176312853611 0.000166627777081 0.000238594002488 0.310748752834 0.000217455438679 7.11432678408e-08
600_seg3 MMT017 FC 0.000153268925353 0.000251620632952 0.000106985726357 0.000156204944496 0.00017625584042 0.000169749045841 0.000238693173226 0.31028100907 0.000221144903427 7.39330885354e-08
602_seg3 MMT017 FC 0.000156813554402 0.000256179252156 0.000109585287942 0.000159624533967 0.000178485003128 0.000173177807564 0.000244430734728 0.30919744898 0.000225713984208 7.6884579864e-08
604_seg3 MMT017 FC 0.000158359588835 0.000253165006268 0.000112080595151 0.00016124117919 0.000176650665093 0.000175173437541 0.0002398402736 0.309540079365 0.000228153958221 7.91761752516e-08
606_seg3 MMT017 FC 0.000161485752428 0.00025605535447 0.000114598999186 0.000164333908669 0.000177957424803 0.000178320651275 0.000242840702692 0.31441984127 0.000234122667792 8.35223941187e-08
608_seg3 MMT017 FC 0.000163083257596 0.000255593259144 0.000116681887591 0.000165932196135 0.000177629099382 0.000180143736107 0.000242278493294 0.309658786848 0.000234893836423 8.43876669844e-08
610_seg3 MMT017 FC 0.00016556366222 0.000254573777552 0.000119657941448 0.00016855820854 0.00017661235349 0.000183100023497 0.000239855605152 0.313449546485 0.000239660961606 8.84009837688e-08
612_seg3 MMT017 FC 0.00016862314945 0.000258790634287 0.000121944687503 0.000171699100899 0.000178750202197 0.000186233552287 0.000244814694619 0.311818197279 0.000243406450277 9.10942476498e-08
614_seg3 MMT017 FC 0.000169541075465 0.000256179237092 0.000123980937225 0.000172725418161 0.000177317932186 0.000187593926558 0.00024126916815 0.308145011338 0.000243455135792 9.18201297727e-08
616_seg3 MMT017 FC 0.000171644529333 0.000259036448339 0.000125692624121 0.000174712153381 0.000178816713831 0.000189527474569 0.000245059496424 0.308017290249 0.000246307936542 9.40248859752e-08
618_seg3 MMT017 FC 0.00017223049075 0.000258840086966 0.000127112859903 0.000175610518358 0.000178705989618 0.000190552430858 0.000244811363492 0.301660204082 0.000245094504393 9.36450209632e-08
620_seg3 MMT017 FC 0.000173850329339 0.000258377622979 0.000129163404836 0.000177104624154 0.000178524062449 0.000192171705633 0.000243975475932 0.311033503401 0.000250645545911 9.86134913205e-08
622_seg3 MMT017 FC 0.000174736379503 0.000254270021395 0.000131562265689 0.000178122535596 0.000176326370403 0.00019360000096 0.00023909050084 0.315769727891 0.000253672963911 1.0202482166e-07
624_seg3 MMT017 FC 0.000176377031967 0.000257168154409 0.000132965165479 0.00017973430444 0.000177885103518 0.000195087313617 0.000242729637495 0.314559863946 0.00025549809096 1.03513471948e-07
626_seg3 MMT017 FC 0.000175941331762 0.00025433844149 0.000134016652938 0.000179297290439 0.000176464637935 0.000194861825486 0.000239396810428 0.31095255102 0.000253717803469 1.02875142696e-07
628_seg3 MMT017 FC 0.000176735517661 0.000253847148384 0.000135538718846 0.000179955412683 0.000176129239361 0.000195624141777 0.000238191015481 0.3146861678 0.000256145892423 1.05390609907e-07
630_seg3 MMT017 FC 0.000177126893429 0.000254585198037 0.000136186539018 0.00018038293584 0.000176869503406 0.000195987311444 0.000240344888596 0.3104680839 0.000255338828852 1.04729280919e-07
632_seg3 MMT017 FC 0.000179197509317 0.000257084057125 0.000137687466289 0.000182351277033 0.000178291774608 0.000197869046623 0.000243586374131 0.314806292517 0.000259796090415 1.0827776065e-07
634_seg3 MMT017 DH 0.00018016262732 0.000257513286203 0.000138830033329 0.000183078848958 0.000178301261056 0.000198644652587 0.000243653225243 0.315479195011 0.0002614309619 1.09916948504e-07
636_seg3 MMT017 DH 0.000174958754308 0.000237864620855 0.000140380879661 0.000178840692228 0.000168614394131 0.000195402416221 0.000219191567043 0.314391893424 0.000253596571932 1.06330774217e-07
638_seg3 MMT017 DH 0.0001809787201 0.000254934375415 0.000140904631409 0.000183877497139 0.000176712355601 0.000199745668746 0.000239877210491 0.317322108844 0.00026325082678 1.12123353652e-07
640_seg3 MMT017 DH 0.000181862460285 0.000259339561397 0.000141002551259 0.00018462775722 0.000178871594173 0.000200211512545 0.000245118344419 0.313861678005 0.000263202798612 1.11735912018e-07
642_seg3 MMT017 DH 0.000180611860246 0.000260040603419 0.000140523710707 0.000183539665724 0.000179422522261 0.000198973548503 0.000245646521471 0.300041326531 0.000256529933094 1.06246835419e-07
644_seg3 MMT017 DH 0.000181150439282 0.000254312080935 0.000141851042273 0.000184207181973 0.000176322225242 0.000200115069185 0.000238545237636 0.313639115646 0.000262159045032 1.11705292909e-07
646_seg3 MMT017 DH 0.00018309888038 0.000256845024667 0.000143520651199 0.000186139480888 0.000177292308113 0.00020206460052 0.00024144881944 0.316480612245 0.000265921886878 1.15014387563e-07
648_seg3 MMT017 DH 0.000182910538095 0.000256392044991 0.000143404995565 0.00018601289745 0.000177412865592 0.00020191265208 0.000241467160619 0.314119501134 0.000264772374687 1.14119795168e-07
650_seg3 MMT017 DH 0.000182987456703 0.000254884186269 0.000144259717681 0.000186384942847 0.000176853808793 0.000202413490771 0.000239901347457 0.313862018141 0.000264793720292 1.14434517129e-07
652_seg3 MMT017 DH 0.000183651793323 0.000254627378937 0.000145154509271 0.00018700654577 0.00017686410099 0.000203068536207 0.000239934818937 0.313624659864 0.000265646119461 1.15261760074e-07
654_seg3 MMT017 DH 0.000185253197437 0.000257773733236 0.000146358351883 0.000188659548184 0.000178339802355 0.000204597909253 0.000243204928525 0.313145351474 0.000267683298744 1.16870813928e-07
656_seg3 MMT017 DH 0.000186598763856 0.00025624017457 0.000148278601785 0.000190114744895 0.000177862869175 0.000206221358384 0.00024203005969 0.317666666667 0.000271311033572 1.20338594101e-07
658_seg3 MMT017 DH 0.000186453223614 0.000255068902766 0.000148995928833 0.000189824854696 0.000176873420171 0.000206079812952 0.000239933022953 0.313473356009 0.000269421425592 1.18939791843e-07
660_seg3 MMT017 DH 0.00018937435654 0.000258112472808 0.000151219881233 0.000192870308296 0.000178723494768 0.000209044699808 0.000244235654934 0.317524263039 0.000275185794888 1.23902676888e-07
662_seg3 MMT017 DH 0.00018908919299 0.000255460502347 0.000152045983714 0.000192600141139 0.000177476516807 0.000208939148582 0.000241217560251 0.317999376417 0.000274972157245 1.24252657725e-07
664_seg3 MMT017 DH 0.000189597562997 0.000254436728289 0.000153083690875 0.00019284791066 0.000176711073593 0.000209366535363 0.000239887193155 0.316509126984 0.000275094963049 1.24530136972e-07
666_seg3 MMT017 DH 0.000190390717449 0.000254557319035 0.00015420874984 0.000193606220967 0.000176508140039 0.000210215472643 0.000238923940595 0.316883106576 0.000276349906958 1.25964225612e-07
668_seg3 MMT017 DH 0.000191246263833 0.000257450871986 0.000154467455559 0.000194431649779 0.000178439576758 0.000210813156202 0.000243563626218 0.31288537415 0.000276093007155 1.25352075863e-07
670_seg3 MMT017 DH 0.000191956902594 0.000256719831569 0.000155603123282 0.000195223885535 0.000177983634536 0.000211699662123 0.000242346176368 0.313357482993 0.00027736260891 1.26839136866e-07
672_seg3 MMT017 DH 0.000193194889681 0.000257447302249 0.000156927341423 0.00019643649412 0.000178202086185 0.000212999137625 0.000242681578993 0.313528004535 0.000279312911767 1.28860875693e-07
c0002953_seg_adthreshold_scaledsub DIV RG 0.000113458984461 0.000261095527631 7.05630724652e-05 0.000116689029007 0.0002084013358 0.00013381196809 0.000231651894134 0.168794722263 0.000138198493768 2.58306109593e-08
c0002957_seg_adthreshold_scaledsub DIV MF 0.000285468853008 0.000397883288375 0.000226823297219 0.000285900755896 0.000275837981426 0.000306227399413 0.000402845463559 0.300198133839 0.000402434334752 2.53516091201e-07
c0002961_seg_adthreshold_scaledsub DIV MF 0.000237154217353 0.000389196088856 0.000165829680799 0.000240328668371 0.000274793910833 0.000257355257717 0.000411042879793 0.399211401079 0.000387612414623 2.31372276463e-07
c0002964_seg_adthreshold_scaledsub DIV RG 0.000122423987145 0.000272919567102 7.69025886764e-05 0.000124945837191 0.00021625275236 0.000141281283802 0.000249419261891 0.194466686106 0.00015341550966 3.26394743451e-08
c0002970_seg_adthreshold_scaledsub DIV RG 0.000117223515092 0.000266510921438 7.30829493401e-05 0.000120772895527 0.000214761821753 0.000136578283118 0.000247654229053 0.212225688876 0.000150172273539 3.08813376254e-08
c0002973_seg_adthreshold_scaledsub DIV RG 0.000120512770072 0.000276467925297 7.55174481522e-05 0.000123006554204 0.000219914676735 0.000139132437075 0.000252581729339 0.171935850707 0.000147120451046 2.9916804772e-08
c0002978_seg_adthreshold_scaledsub DIV RG 0.000123477584968 0.000281651339617 7.63739012079e-05 0.000125134017407 0.00022101824522 0.00014079127977 0.000259137945684 0.200633765855 0.000155734070733 3.31919929081e-08
c0002981_seg_adthreshold_scaledsub DIV FC 0.000354668773631 0.000444503688146 0.000270137681254 0.000363045905924 0.00028740281418 0.000386501516714 0.000447730672321 0.337226126257 0.000523316341088 4.30226649299e-07
c0002984_seg_adthreshold_scaledsub DIV FC 0.000241391577656 0.000371807136593 0.000172302932881 0.000241870170765 0.000265160098208 0.000261013361954 0.00037266344961 0.270041842834 0.000328471980296 1.57783499114e-07
c0002987_seg_adthreshold_scaledsub DIV MF 0.000331736456509 0.0004269109866 0.00027561547545 0.000338674271411 0.000284109780923 0.000361156218536 0.000432288603013 0.27145283569 0.000449635546055 3.14782083829e-07
c0002990_seg_adthreshold_scaledsub DIV RG 0.000139680702102 0.00027046330748 0.000101761792114 0.000140155183375 0.00021611137223 0.000158367421588 0.000245872454704 0.12161350051 0.000160734009185 3.90965965764e-08
c0002993_seg_adthreshold_scaledsub DIV RG 0.000230060731882 0.000376276574536 0.000159115088845 0.000234698325326 0.000266753427951 0.000252993145221 0.000378631614677 0.282965009477 0.000318034247324 1.47334662224e-07
c0002996_seg_adthreshold_scaledsub DIV RG 0.000121037898348 0.000261474420559 8.01937223711e-05 0.000122517182028 0.000214615868103 0.000138359074906 0.000244942989006 0.180467852457 0.00014947352344 3.26462451588e-08
c0002999_seg_adthreshold_scaledsub DIV RG 0.000135360468928 0.000285147861924 8.87186607839e-05 0.000137603080183 0.000225973609559 0.0001536077508 0.000270212277037 0.192229916898 0.000168769240068 4.04515563079e-08
c0003002_seg_adthreshold_scaledsub DIV RG 0.000124717946408 0.000274178833738 8.0409336285e-05 0.000125894796141 0.00022326946947 0.000140840556524 0.000263803188675 0.209244058901 0.000159272883087 3.62897618503e-08
c0003005_seg_adthreshold_scaledsub DIV DH 0.000177311102473 0.000256685637428 0.000158303974738 0.000182776643071 0.000207553156685 0.000204381626785 0.000241953852376 0.254998250474 0.000237298233977 9.46527186802e-08
c0003008_seg_adthreshold_scaledsub DIV DH 0.000172246486076 0.000255440943811 0.000155011707035 0.000174919472033 0.000208891706014 0.000195407481489 0.000242562363582 0.258013121446 0.000232449602183 9.10196833911e-08
c0003011_seg_adthreshold_scaledsub DIV RG 9.83703941648e-05 0.000220377058531 6.42852287959e-05 0.000102770985006 0.000185649851731 0.000119468834421 0.0001948500287 0.211163143315 0.000126592274511 2.32961865641e-08
c0003017_seg_adthreshold_scaledsub DIV DH 0.000210241826031 0.000248255116333 0.000218041335339 0.000217766154342 0.00019745777054 0.000244880330222 0.000223795964584 0.279494241143 0.000288194880903 1.49907146758e-07
c0003020_seg_adthreshold_scaledsub DIV DH 0.00018619142123 0.000240944186012 0.000216976883425 0.000192364639052 0.000196838256896 0.000216709166865 0.000219517874834 0.308500072897 0.000267670472155 1.30721039309e-07
c0003023_seg_adthreshold_scaledsub DIV RG 0.00012220095548 0.000274475833067 7.74586654301e-05 0.000125163038365 0.000222050371147 0.000140148518248 0.000261711502398 0.222784808281 0.000158664281086 3.56730162035e-08
c0003024_seg_adthreshold_scaledsub DIV MF 0.000180299227734 0.00036522233185 0.000112805296153 0.000180050901268 0.000264544875967 0.000194041233572 0.000374127454467 0.312789765272 0.000260954164686 9.78687495915e-08
c0003025_seg_adthreshold_scaledsub DIV MF 0.000172117415293 0.000350947228573 0.000108677202742 0.000171071207477 0.000262489333837 0.000184617032919 0.00036657694587 0.332473684211 0.000256559050713 9.63724181035e-08
c0003026_seg_adthreshold_scaledsub DIV DF 6.54374582674e-05 0.00016496694684 4.05004724202e-05 7.44208585895e-05 0.00010822835402 0.000109029162509 8.52828668767e-05 0.085329785683 7.08065369273e-05 6.85895725054e-09
c0003027_seg_adthreshold_scaledsub DIV DF 6.6674762284e-05 0.000169551062507 3.97308137327e-05 7.40735111132e-05 0.000119088811987 0.000101247803367 9.93266087268e-05 0.143897506925 7.73856452661e-05 8.47943156619e-09
c0003028_seg_adthreshold_scaledsub DIV DH 0.000191396927422 0.00024609853419 0.000200117844937 0.000198978839329 0.000198853625639 0.000223493114291 0.000225789945427 0.321549497011 0.000278611991101 1.40844639629e-07
c0003029_seg_adthreshold_scaledsub DIV DH 0.000245657129377 0.00025098926828 0.000338656480633 0.000243494392823 0.000199964968885 0.000272968201962 0.000222934665283 0.214979005686 0.00031185949617 1.94891700239e-07
c0003030_seg_adthreshold_scaledsub DIV DH 0.000253069327817 0.000269749747673 0.000264995735877 0.000259781172109 0.000210745284431 0.000288969001967 0.00024689812019 0.24663434903 0.000333108137182 2.02761868937e-07
c0003031_seg_adthreshold_scaledsub DIV DH 0.000265420619405 0.000265662375165 0.000319460762257 0.000276557119198 0.000210481815586 0.000307586140594 0.000243351369769 0.266968216941 0.000357186219901 2.51319890332e-07
c0003181_seg_adthreshold_scaled2 DIV RG 0.00016751980114 0.000368068941435 0.00010254703859 0.000167435815748 0.000266220323191 0.000180954225764 0.000366415004687 0.244312706702 0.000221633360891 6.87764401313e-08
c0003186_seg_adthreshold_scaled2 DIV FC 0.00017427239219 0.000377349074058 0.000107727496371 0.000174158609325 0.000269871173207 0.000187868074088 0.000374834509629 0.239682690593 0.000228885546512 7.4191973828e-08
c0003211_seg_adthreshold_scaled2 DIV FC 0.000213682912646 0.00041438182081 0.000134090344087 0.00021399465096 0.000281326315488 0.0002291315045 0.000417640135887 0.298426825133 0.000302041332551 1.28473406611e-07
c0003215_seg_adthreshold_scaled2 DIV RG 0.000179428454071 0.000308929056328 0.000127296615643 0.00017996680288 0.000238616052782 0.000198192939518 0.000300787358753 0.2495787381 0.000239829604421 8.38741277897e-08
c0003221_seg_adthreshold_scaled2 DIV RG 0.000171600142077 0.000379158726222 0.000103692673066 0.000171307078933 0.000275039606442 0.000182923408771 0.000400269349801 0.358903286513 0.000265880305325 9.91599130328e-08
c0003222_seg_adthreshold_scaled2 DIV RG 0.000138882718239 0.000331014580771 8.18836596543e-05 0.000138716572179 0.000253957707363 0.000150467088531 0.000333147374981 0.292465518361 0.000196703535584 5.38127559844e-08
c0003224_seg_adthreshold_scaled2 DIV RG 0.000319146308239 0.000424751253604 0.000255817907871 0.000322216553666 0.00028464334892 0.000343887289773 0.000425083714509 0.257724809569 0.000426074329121 2.84604036632e-07
C0004033_SEG DIV PP 5.44590019874e-05 0.000103446971526 4.59514099819e-05 5.61983161833e-05 7.40974048748e-05 6.08992241727e-05 9.85268588725e-05 0.108279892619 6.11331547196e-05 6.26873541604e-09
C0004068_SEG DIV PP 3.6084061835e-05 7.52591967964e-05 2.78180317169e-05 3.71041607199e-05 5.78421009768e-05 4.27376419798e-05 6.31648577284e-05 0.0675948024375 3.92630542349e-05 2.2044745993e-09
C0004158_SEG DIV PP 3.93524561284e-05 7.89228553879e-05 3.13563330406e-05 4.08240635784e-05 6.05778535548e-05 4.62843082903e-05 6.82266965565e-05 0.0773387622615 4.33740305418e-05 2.85856365623e-09
D0001122_SEG_ADTHRESHOLD_SCALED2 DIV FC 0.000176813340484 0.000326215412507 0.000132714937882 0.000182413588952 0.000252105979943 0.000211793705538 0.000275968963956 0.313458403028 0.00025337502981 1.01171218709e-07
D0001123_SEG_ADTHRESHOLD_SCALED2 DIV FC 0.000163579628764 0.000331187840038 0.00011235484791 0.000167778936161 0.000275460370318 0.000190319712837 0.000319326132101 0.458505960534 0.000297746603727 1.37106125905e-07
